# Supplementary material for: The Potential Impact of a Hepatitis C Vaccine for People Who Inject Drugs: Is a Vaccine Needed in the Age of Direct-Acting Antivirals?
Source: PubMed Central journal article supplement (PMC4880220; doi:10.1371/journal.pone.0156213), 2016-05-25

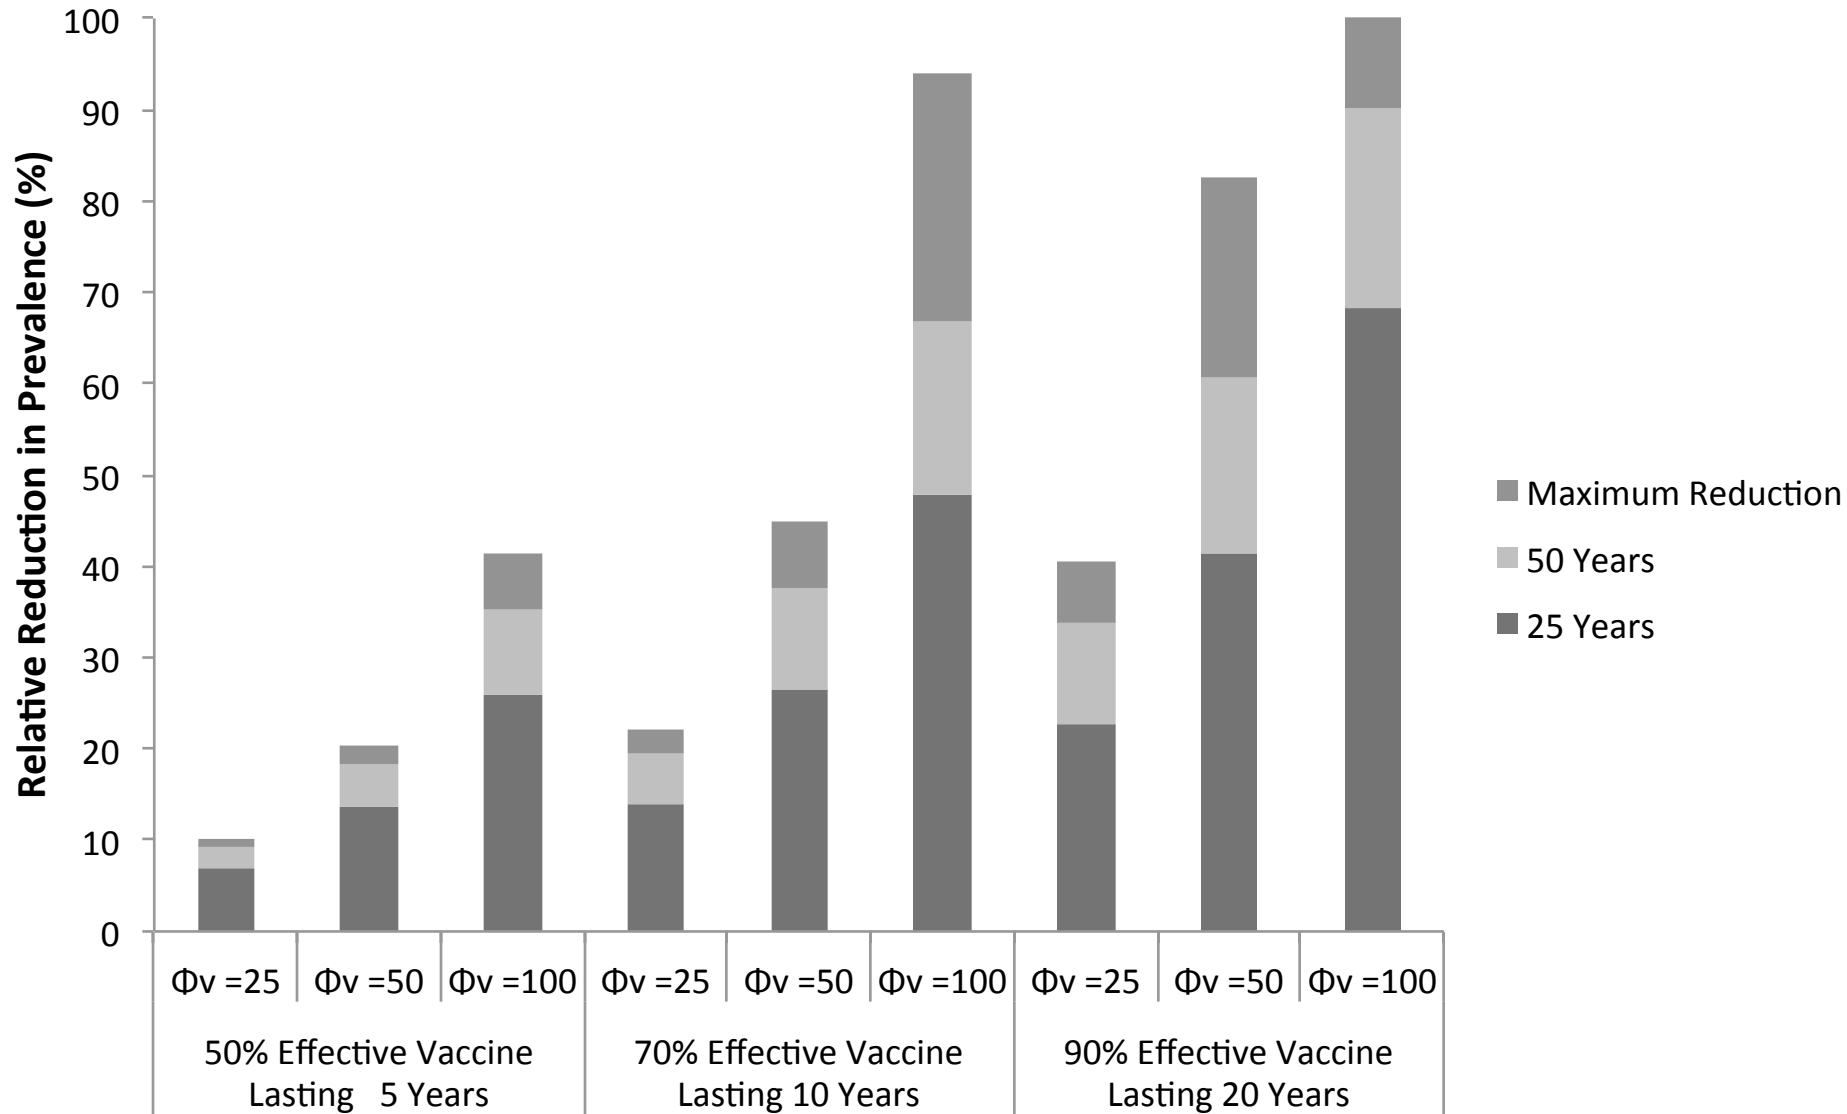

Supplement: pone.0156213.s001.pdf [file pone.0156213.s001.pdf]
